# Supplementary material for: Relationship between Body Composition and Biochemical Parameters with Antioxidant Status in a Healthy Cohort of Postmenopausal Women
Source: MDPI journal article supplement (doi:10.3390/metabo12080746), 2022-08-14
Supplement: s1 [file s1]

**Table S1.-** Sociodemographic variables of the study.

| <b>Characteristics</b>              | <b>Total population (n = 78)</b> |            |
|-------------------------------------|----------------------------------|------------|
|                                     | <b>N</b>                         | <b>(%)</b> |
| <b>Sociodemographic</b>             |                                  |            |
| <b>Blood pressure</b>               | -                                | -          |
| Normal blood pressure               | 43                               | (55)       |
| High blood pressure                 | 35                               | (45)       |
| <b>Physical exercise</b>            | -                                | -          |
| Sedentary                           | 20                               | (26)       |
| Non-sedentary                       | 58                               | (74)       |
| <b>Smoking habit</b>                | -                                | -          |
| Non-smoker                          | 62                               | (80)       |
| Smoker                              | 16                               | (20)       |
| <b>Educational level</b>            | -                                | -          |
| Basic educational level             | 29                               | (37)       |
| Secondary or high educational level | 49                               | (63)       |

N = 78. All variables are expressed as frequencies (N) and percentages (%).
